# Supplementary material for: The heterointerface effect to boost the catalytic performance of single atom catalysts for sulfur conversion in lithium–sulfur batteries
Source: Royal Society of Chemistry journal article supplement (doi:10.1039/d3cp05883b), 2024-01-01
Supplement: d3cp05883b2.pdf [file d3cp05883b2.pdf]

# Supporting Information

## Heterointerface Effect on Catalytic Performance of Single Atom Catalysts for Sulfur Chemistry in Lithium-sulfur Batteries

Haikuan Liang, Zhihao Zeng, Zhengping Qiao\*, Yan Li\*, Chengxin Wang

State key Laboratory of Optoelectronic Materials and Technologies, School of Materials Science and Engineering, Sun Yat-sen (Zhongshan) University, Guangzhou 510275, People's Republic of China

\* Corresponding Authors E-mail: cesqzp@mail.sysu.edu.cn; liyan266@mail.sysu.edu.cn

### Data1. For Section 3.1

Table S1 Cell parameters (cp), the corresponding supercells (cs), the supercell of graphene (sg) for SACs, the lattice mismatch (lm), and the total number of atoms contained in the heterostructure materials (tma).

|                               | cp(Å)          | cs        | sg        | lm     | tma |
|-------------------------------|----------------|-----------|-----------|--------|-----|
| TiS <sub>2</sub>              | a = b = 3.377  | 5 × 5 × 1 | 7 × 7 × 1 | 2.354% | 172 |
| C <sub>3</sub> N <sub>4</sub> | a = b = 7.150  | 2 × 2 × 1 | 6 × 6 × 1 | 1.777% | 127 |
| BN                            | a = b = 2.513  | 5 × 5 × 1 | 5 × 5 × 1 | 1.749% | 99  |
| G <sup>#</sup>                | a = b = 2.468  | 6 × 6 × 1 | 6 × 6 × 1 | 0.000% | 99  |
| rGO                           | a = b = 12.188 | 1 × 1 × 1 | 5 × 5 × 1 | 1.211% | 106 |

# The 6 × 6 × 1 supercell of graphene is used to construct SACs.

Table S2  $E_{\text{bin}}$ , interval-distance and charge transfer of two components of different heterostructures.

| heterostructures                                  | $E_{\text{bin}}$ (meV Å <sup>-2</sup> ) | Interlayer distance (Å) | Charge transfer (e/cell) <sup>#</sup> |
|---------------------------------------------------|-----------------------------------------|-------------------------|---------------------------------------|
| VN <sub>4</sub> @G/TiS <sub>2</sub>               | -18.84                                  | 3.32                    | -1.48                                 |
| VN <sub>4</sub> @G/C <sub>3</sub> N <sub>4</sub>  | -18.06                                  | 3.24                    | -0.76                                 |
| VN <sub>4</sub> @G/BN                             | -21.32                                  | 3.25                    | -0.02                                 |
| VN <sub>4</sub> @G/G                              | -19.28                                  | 3.26                    | -0.11                                 |
| VN <sub>4</sub> @G/rGO                            | -12.15                                  | 3.95                    | -0.43                                 |
| MoN <sub>4</sub> @G/TiS <sub>2</sub>              | -10.81                                  | 3.36                    | -1.11                                 |
| MoN <sub>4</sub> @G/C <sub>3</sub> N <sub>4</sub> | -7.49                                   | 3.29                    | -0.20                                 |
| MoN <sub>4</sub> @G/BN                            | -24.85                                  | 3.26                    | -0.05                                 |
| MoN <sub>4</sub> @G/G                             | -19.19                                  | 3.20                    | -0.16                                 |
| MoN <sub>4</sub> @G/rGO                           | -12.71                                  | 3.96                    | -0.51                                 |
| WN <sub>4</sub> @G/TiS <sub>2</sub>               | -14.82                                  | 3.37                    | -1.11                                 |
| WN <sub>4</sub> @G/C <sub>3</sub> N <sub>4</sub>  | -8.15                                   | 3.29                    | -0.19                                 |
| WN <sub>4</sub> @G/BN                             | -26.39                                  | 3.25                    | -0.07                                 |
| WN <sub>4</sub> @G/G                              | -20.79                                  | 3.21                    | -0.19                                 |
| WN <sub>4</sub> @G/rGO                            | -14.36                                  | 3.95                    | -0.53                                 |

# For charge transfer, a negative value means that the MN<sub>4</sub>@G layer loses charge.

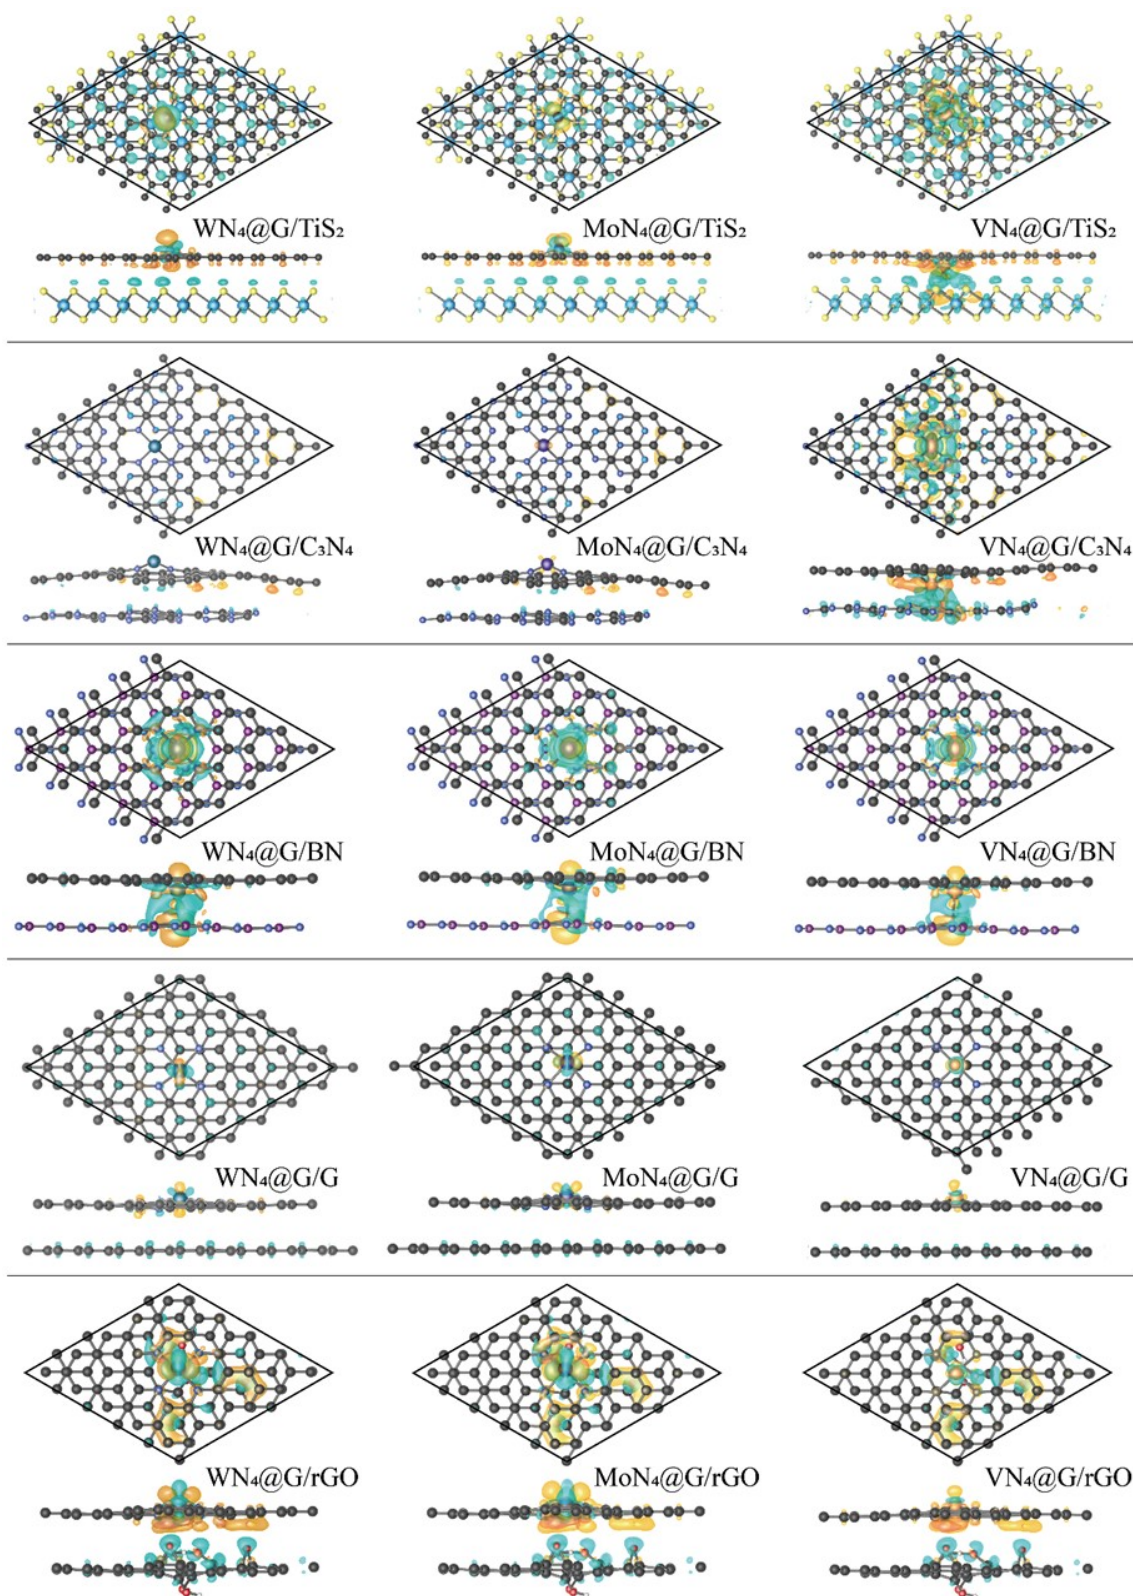

Figure S1 Structural configurations and charge density difference of heterostructures. Blue and origin isosurface indicate electron accumulation and depletion, respectively. The value of isosurface is  $0.001 \text{ e/Bohr}^3$ .

## Data2. For Section 3.2

Table S3 Predicted values of  $E_b$  (eV) of  $\text{Li}_2\text{S}$  on the plane of  $\text{MN}_4@G$  in heterostructure materials according to three different linear relations ( $\Delta E-E_b$ ,  $\Delta E(*\text{LiS})-E$  and  $\text{ICOHP}-E_b$ ) as well as those obtained from CI-NEB method.

| heterostructure                       | $E_b$ ( $\Delta E$ ) | $E_b$ ( $\Delta E(*\text{LiS})$ ) | $E_b$ (ICOHP) | $E_b$ (CI-NEB) |
|---------------------------------------|----------------------|-----------------------------------|---------------|----------------|
| $\text{VN}_4@G/\text{TiS}_2$          | 0.55                 | 1.07                              | 1.31          | 0.54           |
| $\text{VN}_4@G/\text{C}_3\text{N}_4$  | 2.24                 | 2.01                              | 1.85          | -              |
| $\text{VN}_4@G/\text{BN}$             | 0.81                 | 0.98                              | 1.68          | 0.75           |
| $\text{VN}_4@G/G$                     | 0.79                 | 0.91                              | 1.65          | -              |
| $\text{VN}_4@G/\text{rGO}$            | 0.79                 | 0.93                              | 1.55          | -              |
| $\text{MoN}_4@G/\text{TiS}_2$         | 0.40                 | 0.94                              | 0.68          | 0.44           |
| $\text{MoN}_4@G/\text{C}_3\text{N}_4$ | 0.57                 | 0.61                              | 0.72          | -              |
| $\text{MoN}_4@G/\text{BN}$            | 0.63                 | 0.81                              | 0.86          | -              |
| $\text{MoN}_4@G/G$                    | 0.74                 | 0.82                              | 1.02          | -              |
| $\text{MoN}_4@G/\text{rGO}$           | 0.56                 | 0.74                              | 0.83          | 0.58           |
| $\text{WN}_4@G/\text{TiS}_2$          | 0.43                 | 0.92                              | 0.54          | 0.41           |
| $\text{WN}_4@G/\text{C}_3\text{N}_4$  | 0.57                 | 0.62                              | 0.57          | 0.50           |
| $\text{WN}_4@G/\text{BN}$             | 0.62                 | 0.80                              | 0.74          | -              |
| $\text{WN}_4@G/G$                     | 0.72                 | 0.79                              | 0.96          | 0.83           |
| $\text{WN}_4@G/\text{rGO}$            | 0.54                 | 0.72                              | 0.70          | -              |

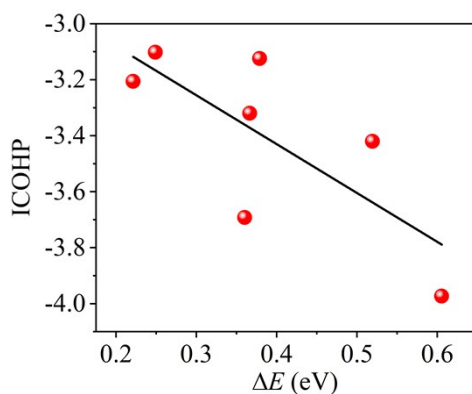

Figure S2 Relationship between  $\Delta E$  and ICOHP for several heterostructures.

### Data3. For Section 3.3

Table S4 Adsorption energies of S<sub>8</sub> and LiPs on different substrates as well as that on DOL and DME for comparison.[1]

| substrates                            | Li <sub>2</sub> S (eV) | Li <sub>2</sub> S <sub>2</sub> (eV) | Li <sub>2</sub> S <sub>4</sub> (eV) | Li <sub>2</sub> S <sub>6</sub> (eV) | Li <sub>2</sub> S <sub>8</sub> (eV) | S <sub>8</sub> (eV) |
|---------------------------------------|------------------------|-------------------------------------|-------------------------------------|-------------------------------------|-------------------------------------|---------------------|
| MoN <sub>4</sub> @G/TiS <sub>2</sub>  | -4.67                  | -3.72                               | -3.71                               | -3.35                               | -3.28                               | -2.11               |
| TiS <sub>2</sub> /MoN <sub>4</sub> @G | -3.54                  | -2.42                               | -1.65                               | -0.94                               | -1.16                               | -0.43               |
| Mo <sub>4</sub> @G                    | -4.06                  | -3.36                               | -3.46                               | -3.14                               | -3.71                               | -2.10               |
| WN <sub>4</sub> @G/TiS <sub>2</sub>   | -5.21                  | -5.15                               | -4.13                               | -4.17                               | -4.33                               | -2.52               |
| TiS <sub>2</sub> /WN <sub>4</sub> @G  | -3.62                  | -2.43                               | -1.65                               | -0.84                               | -1.18                               | -0.45               |
| WN <sub>4</sub> @G                    | -4.50                  | -3.92                               | -4.16                               | -4.29                               | -3.99                               | -2.63               |
| VN <sub>4</sub> @G/TiS <sub>2</sub>   | -1.73                  | -1.64                               | -0.96                               | -1.04                               | -1.14                               | -0.59               |
| TiS <sub>2</sub> /VN <sub>4</sub> @G  | -3.15                  | -2.53                               | -1.78                               | -1.00                               | -1.29                               | -0.48               |
| VN <sub>4</sub> @G                    | -3.93                  | -3.22                               | -3.00                               | -2.97                               | -3.19                               | -1.58               |
| G/TiS <sub>2</sub>                    | -1.57                  | -1.69                               | -1.03                               | -0.94                               | -1.01                               | -0.55               |
| TiS <sub>2</sub> /G                   | -3.79                  | -2.72                               | -1.80                               | -0.98                               | -1.22                               | -0.47               |
| G                                     | -1.30                  | -1.16                               | -0.75                               | -0.83                               | -0.85                               | -0.49               |
| TiS <sub>2</sub>                      | -3.60                  | -2.45                               | -1.77                               | -0.90                               | -1.08                               | -0.32               |
| DOL [1]                               | -                      | -                                   | -0.87                               | -0.90                               | -0.92                               | -                   |
| DME [1]                               | -                      | -                                   | -0.92                               | -0.95                               | -0.98                               | -                   |

### References

[1] T. Li, C. He, W. Zhang, A novel porous C<sub>4</sub>N<sub>4</sub> monolayer as a potential anchoring material for lithium–sulfur battery design, *Journal of Materials Chemistry A*, 7 (2019) 4134-4144.
